# Supplementary material for: Shift of maternal gut microbiome of Tibetan antelope (Pantholops hodgsonii) during the perinatal period
Source: bioRxiv or medRxiv preprint supplement (doi:10.1101/2020.01.13.903591), 2020-01-17
Supplement: Supplementary file [file media-1.pdf]

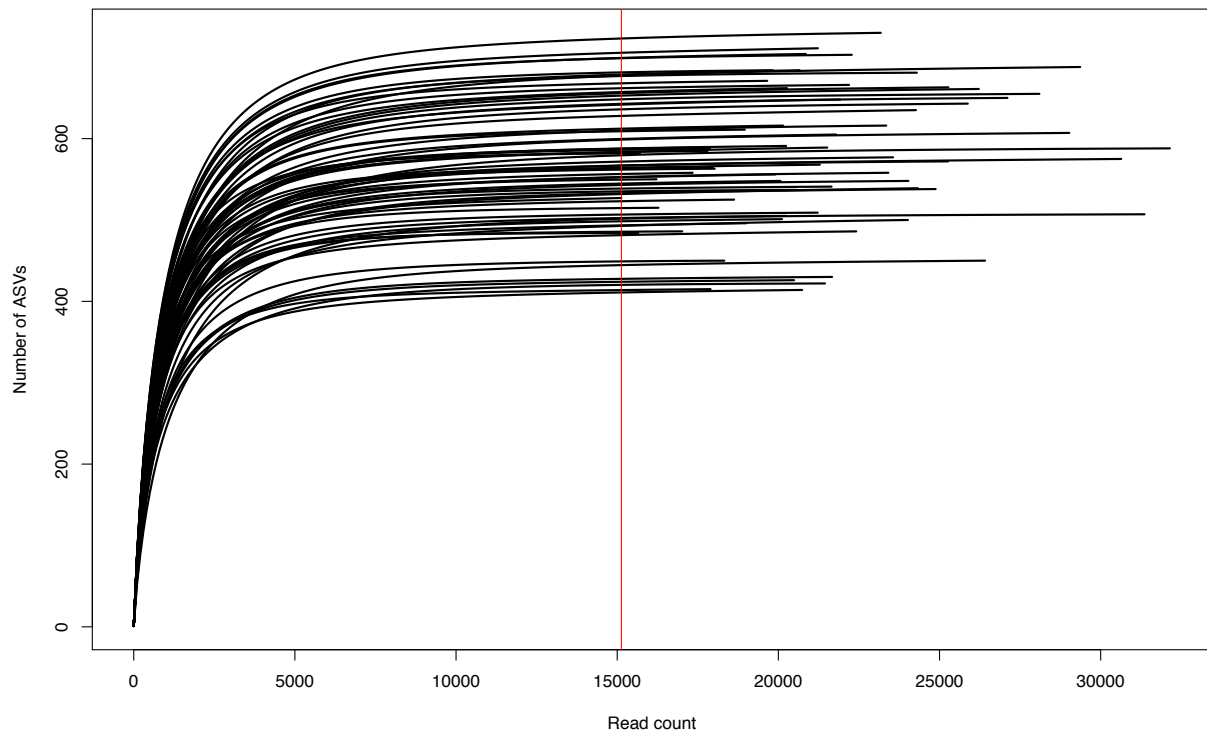

**Supplementary Figure 1** Rarefaction curves calculated for the number of amplicon sequence variants (ASVs) with increasing sequencing depth. Note: each curve represents a sample and  $N=65$ . The red vertical line indicates the minimum number of reads found in the dataset after filtering, which is 15,129 reads.

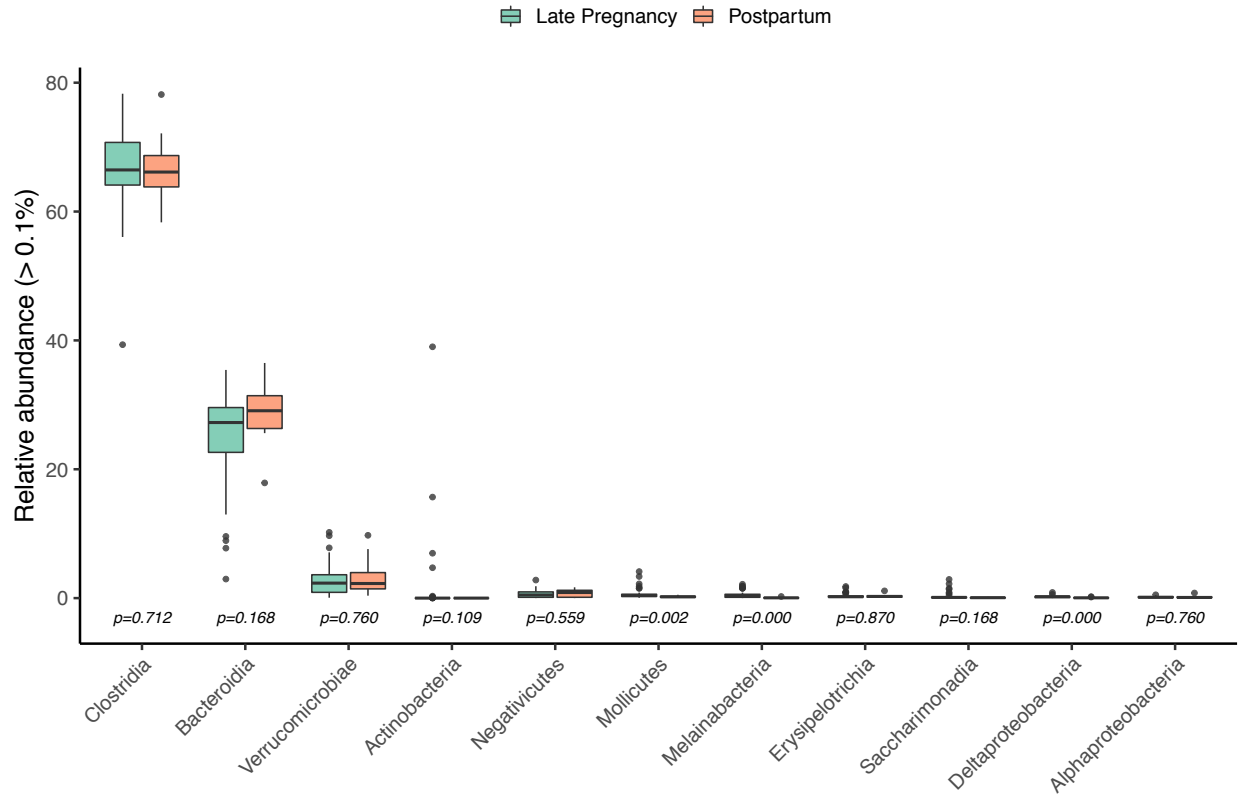

**Supplementary Figure 2** Classes found in the maternal gut microbiome of Tibetan antelope with relative abundance greater than 0.1%. Changes in the relative abundance of classes between reproductive states were analyzed through Wilcoxon signed-rank tests and *p* values were adjusted with the Benjamini-Hochberg method to control for false discovery rate.

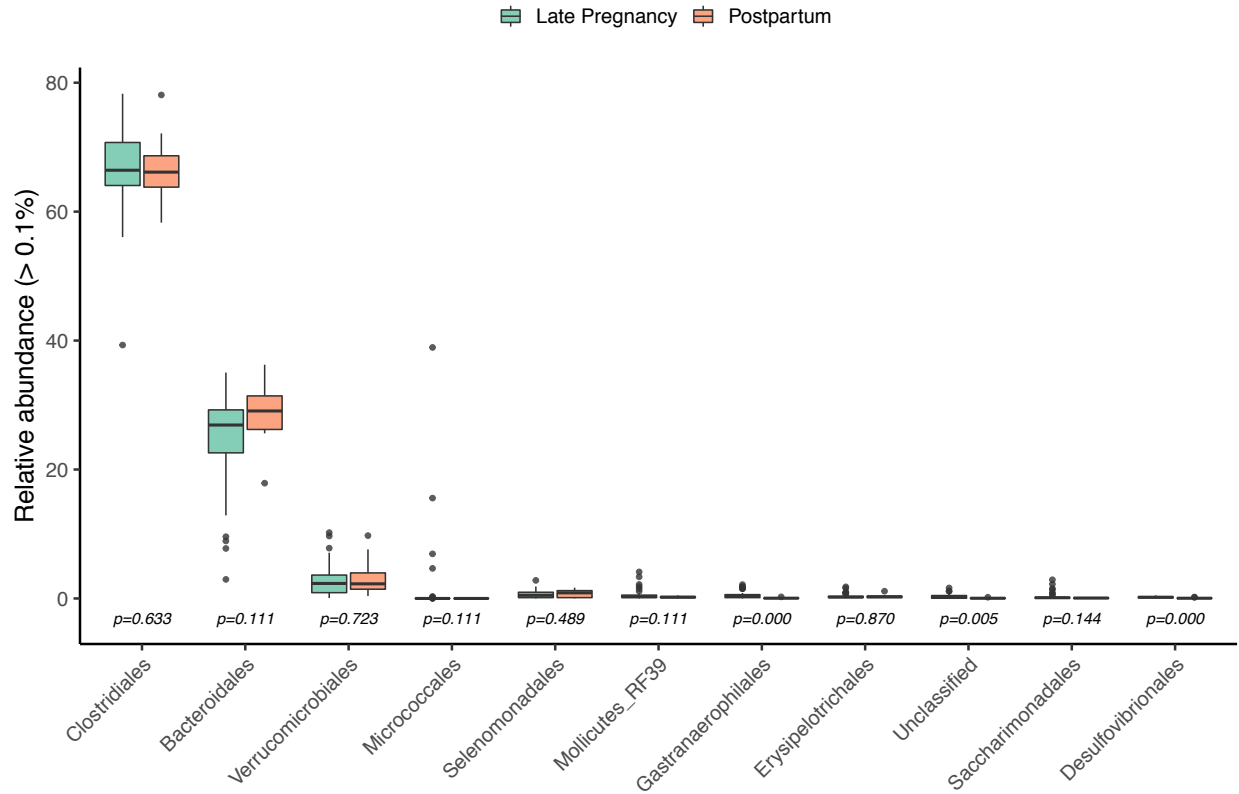

**Supplementary Figure 3** Orders found in the maternal gut microbiome of Tibetan antelope with relative abundance greater than 0.1%. Changes in the relative abundance of orders between reproductive states were analyzed through Wilcoxon signed-rank tests and *p* values were adjusted with the Benjamini-Hochberg method to control for false discovery rate.

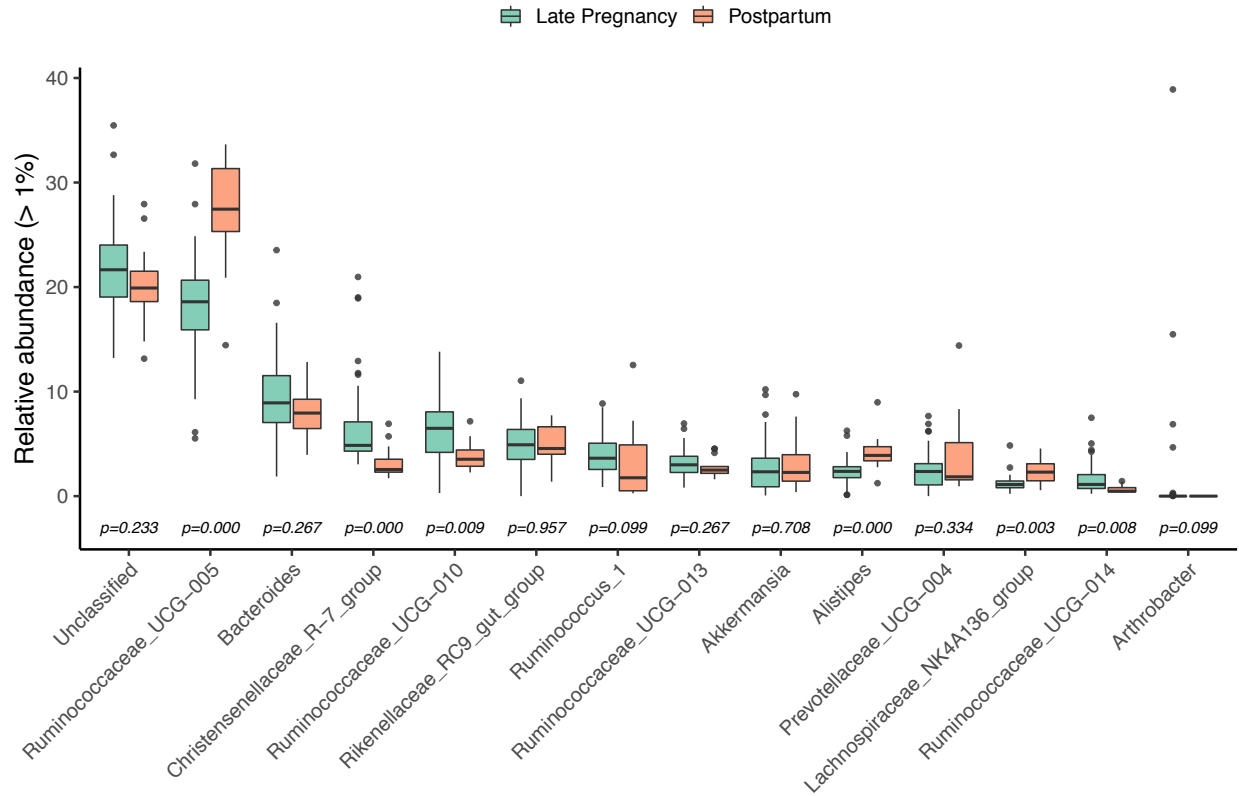

**Supplementary Figure 4** Genera found in the maternal gut microbiome of Tibetan antelope with relative abundance greater than 1%. Changes in the relative abundance of genera between reproductive states were analyzed through Wilcoxon signed-rank tests and  $p$  values were adjusted with the Benjamini-Hochberg method to control for false discovery rate.

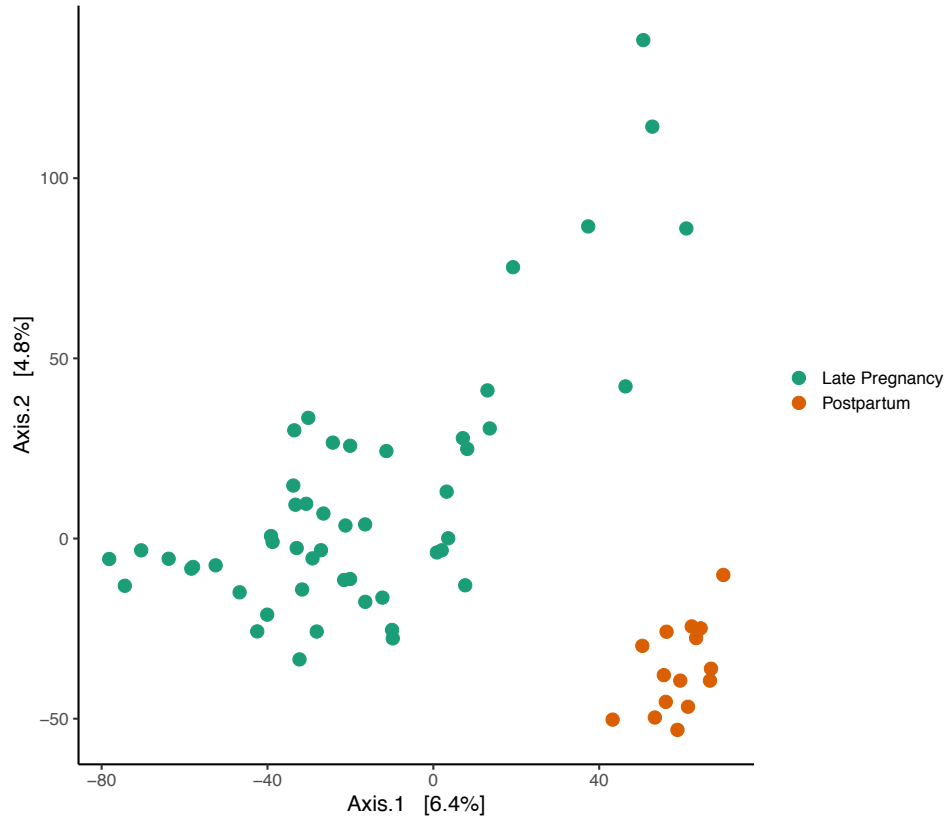

**Supplementary Figure 5** Principal coordinates analysis (PCoA) for gut microbial communities as a function of the reproductive state (N=65). The analysis was based on Euclidean distance after variance stabilizing transformation.

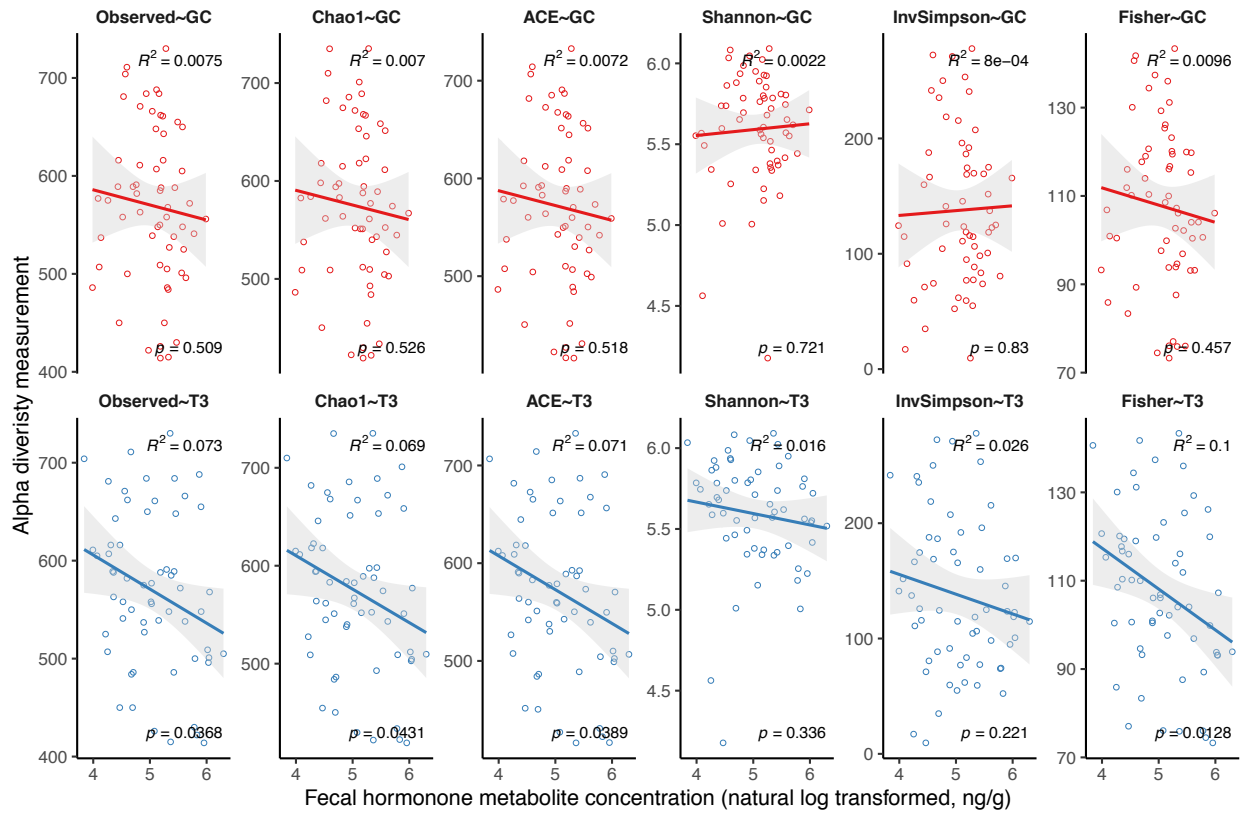

**Supplementary Figure 6** Relationships between fecal hormone metabolite concentrations (GC and T3) and microbiome alpha diversity measurements regardless of reproductive states.
